# Supplementary material for: Myxoma Virus-Loaded Mesenchymal Stem Cells in Experimental Oncolytic Therapy of Murine Pulmonary Melanoma
Source: PubMed Central journal article supplement (PMC7398944; doi:10.1016/j.omto.2020.07.003), 2020-07-06
Supplement: mmc1.pdf [file mmc1.pdf]

**OMTO, Volume 18**

**Supplemental Information**

**Myxoma Virus-Loaded Mesenchymal Stem Cells  
in Experimental Oncolytic Therapy  
of Murine Pulmonary Melanoma**

**Joanna Jazowiecka-Rakus, Aleksander Sochanik, Aleksandra Rusin, Agata Hadryś, Wojciech Fidyk, Nancy Villa, Masmudur M. Rahman, Ewa Chmielik, Lina S. Franco, and Grant McFadden**

## Myxoma virus-loaded mesenchymal stem cells in experimental oncolytic therapy of murine pulmonary melanoma

Joanna Jazowiecka-Rakus, Aleksander Sochanik, Aleksandra Rusin, Agata Hadryś, Wojciech Fidyk, Nancy Villa, Masmudur M. Rahman, Ewa Chmielik, Lina S. Franco, Grant McFadden

**Table S1.** Primers

| Gene name                       | Forward primer (5'-3')   | Reverse primer (5'-3')   |
|---------------------------------|--------------------------|--------------------------|
| <i>mPD-L1/CD274</i>             | TGCGGACTACAAGCGAATCACG   | CTCAGCTTCTGGATAACCCCTCG  |
| <i>mINF<math>\gamma</math></i>  | CAGCAACAGCAAGGCGAAAAAGG  | TTTCCGCTTCCTGAGGCTGGAT   |
| <i>mPD-1</i>                    | CGGTTTCAAGGCATGGTCATTGG  | TCAGAGTGTCGTCCTTGCTTCC   |
| <i>mIL-15</i>                   | GTAGGTCTCCCTAAAACAGAGGC  | TCCAGGAGAAAGCAGTTCATTGC  |
| <i>mCD8a</i>                    | ACTACCAAGCCAGTGCTGCGAA   | ATCACAGGCGAAGTCCAATCCG   |
| <i>mCD4</i>                     | G TTCAGGACAGCGACTTCTGGA  | GAAGGAGAACTCCGCTGACTCT   |
| <i>mTNF-<math>\alpha</math></i> | GGTGCCTATGTCTCAGCCTCTT   | GCCATAGA ACTGATGAGAGGGAG |
| <i>mIL-1<math>\beta</math></i>  | TGACCTTCCAGGATGAGGACA    | G TTCATCTCGGAGCCTGTAGTG  |
| <i>mGAPDH</i>                   | CATCACTGCCACCCAGAAGACTG  | ATGCCAGTGAGCTTCCC GTTCAG |
| <i>hB2M</i>                     | CCACTGAAAAAGATGAGTATGCCT | CCAATCCAAATGCGGCATCTTCA  |
| <i>hGAPDH</i>                   | GTCTCCTCTGACTTCAACAGCG   | ACCACCCTGTTGCTGTAGCCAA   |

**Multimedia File S1. Co-culture of MYXV-infected MSCs with melanoma cells.** Time-lapse (3-48h) fluorescence microscopy of vMyx-EGFP-infected (MOI=10) MSCs (green fluorescence) co-cultured (1:2 cell/cell ratio) with mRFP-expressing B16-F10 (red fluorescence). Cell-to-cell contact (visible from ca. 3-h time point) between MSCs and melanoma cells enabling cross-infection; yellow-orange fluorescence (overlay) from infected melanoma cells visible besides red and green signals (magn. 10 $\times$ , scale bar 50  $\mu$ m); (AVI file: 97.4 MB).
